# Supplementary material
Source: PubMed Central journal article supplement (PMC9017395)
Supplement: NIHMS1694252-supplement-1.pdf [file NIHMS1694252-supplement-1.pdf]

A

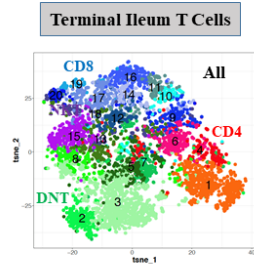

B

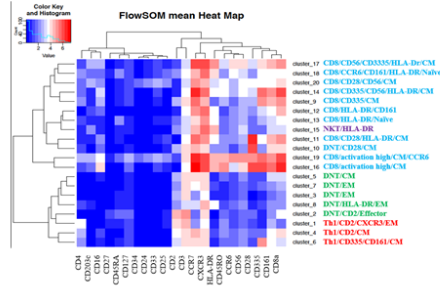

C

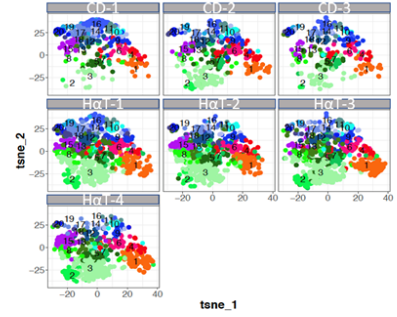

A

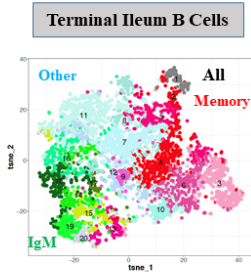

B

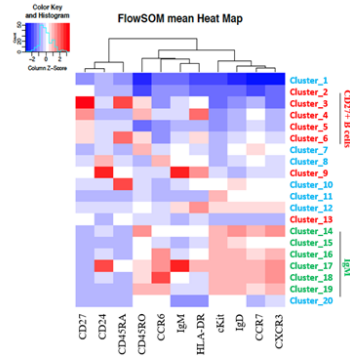

C

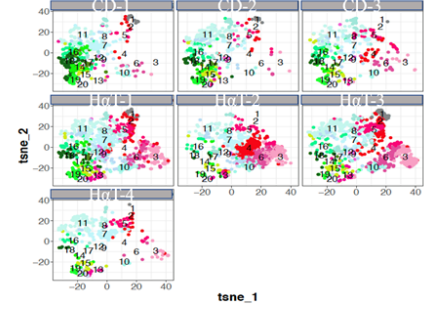

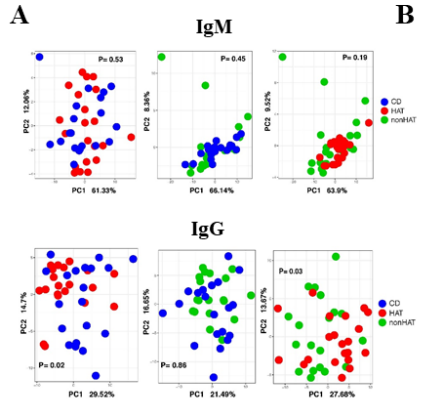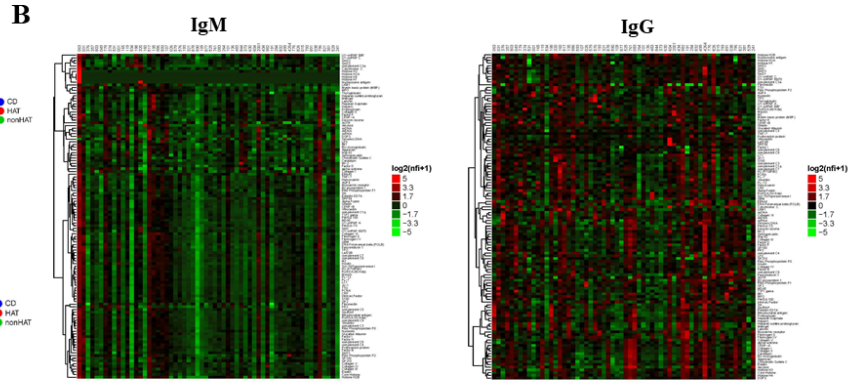

Supplemental Table 4. Basal Serum Tryptase, Tryptase Copy Number Variants and Mast Cell Numbers by Participants

| <b>Number of Participants</b> | <b>Sex</b> | <b>Year of Birth</b> | <b>BST (ng/mL)</b> | <b>Tryptase Alpha Copy Number</b> | <b>Tryptase Beta Copy Number</b> | <b>Mast Cells/HPF</b> |
|-------------------------------|------------|----------------------|--------------------|-----------------------------------|----------------------------------|-----------------------|
| 1.                            | M          | 2001                 | 14.0               | 2                                 | 3                                | 30                    |
| 2.                            | F          | 1974                 | 15.0               | 2                                 | 3                                | 27                    |
| 3.                            | F          | 1959                 | 23.0               | 2                                 | 3                                | 102                   |
| 4.                            | F          | 1956                 | 13.0               | 3                                 | 2                                | 54                    |
| 5.                            | F          | 1975                 | 12.0               | 3                                 | 2                                | 39                    |
| 6.                            | F          | 1964                 | 9.9                | 3                                 | 2                                | 42                    |
| 7.                            | F          | 1981                 | 22.0               | 2                                 | 3                                | 72                    |
| 8.                            | F          | 1995                 | 10.5               | 3                                 | 2                                | 60                    |
| 9.                            | F          | 1965                 | 18.0               | 2                                 | 3                                | 40                    |
| 10.                           | F          | 1944                 | 31.0               | 2                                 | 3                                | 63                    |
| 11.                           | F          | 1975                 | 20.6               | 2                                 | 3                                | 35                    |
| 12.                           | F          | 1946                 | 14.6               | 2                                 | 3                                | 25                    |
| 13.                           | F          | 1983                 | 13.4               | 3                                 | 2                                | 35                    |
| 14.                           | F          | 1993                 | 9.2                | 3                                 | 2                                | 47                    |
| 15.                           | M          | 2001                 | 10.8               | 2                                 | 3                                | 32                    |
| 16.                           | M          | 1941                 | 26.5               | 2                                 | 3                                | 56                    |
| 17.                           | M          | 2004                 | 15.0               | 2                                 | 3                                | 45                    |
| 18.                           | F          | 1981                 | 21.0               | 2                                 | 3                                | 45                    |
| 19.                           | F          | 1980                 | 13.0               | 2                                 | 3                                | 21                    |
| 20.                           | M          | 2002                 | 16.0               | 2                                 | 3                                | 45                    |
| 21.                           | F          | 1982                 | 8.1                | 3                                 | 2                                | 23                    |

## Supplemental Table 1. Summary of HαT-Associated Clinical Features

---

| <b>Characteristics, N = 21 individuals</b>                   |                         |
|--------------------------------------------------------------|-------------------------|
| Mean age, years ± SD                                         | <b>41 ± 19.4</b>        |
| Female sex, N (%)                                            | <b>16 (76)</b>          |
| Male sex, N (%)                                              | <b>5 (24)</b>           |
| <b>Clinical GI Symptoms</b>                                  |                         |
| GERD, N (%)                                                  | <b>4/21 (19.05)</b>     |
| Abdominal Pain, N (%)                                        | <b>19/21 (90.48)</b>    |
| Diarrhea, N (%)                                              | <b>13/21 (61.90)</b>    |
| Constipation, N (%)                                          | <b>9/21 (42.86)</b>     |
| Food Sensitivity, N (%)                                      | <b>5/21 (23.81)</b>     |
| GI Dysmotility, N (%)                                        | <b>4/21 (14.29)</b>     |
| Nocturnal awakening due to abdominal pain or diarrhea, N (%) | <b>21/21 (100)</b>      |
| <b>Laboratory Findings, Median (IQR)</b>                     |                         |
| BST ng/mL                                                    | <b>14 (10.9 - 20.8)</b> |
| GI small intestinal MCs*                                     | <b>40 (33.5 – 52.0)</b> |

---

**Abbreviations:** GERD, gastroesophageal reflux disease; GI, gastrointestinal; IQR, interquartile

range; BST, basal serum tryptase; MCs, mast cells.

**Autoimmune Disorders, N (%) – 12/21 (57.14)**

\*Refer to Figure 2A.

## Supplemental Table 2. Antibody and Metal List

| <b>Metal</b> | <b>General Panel</b> | <b>Clone</b>   | <b>Source</b>              |
|--------------|----------------------|----------------|----------------------------|
| 147          | CD45RO               | UCHL1          | Harvard Core               |
| 151          | CD2                  | TS1/8          | Fluidigm                   |
| 153          | CD45RA               | HI100          | Harvard Core               |
| 154          | CD33                 | WM53           | Harvard Core               |
| 165          | Mast-cell tryptase   | AA1            | Harvard Core, custom conj. |
| 175          | IgD                  | IA6-2          | Harvard Core               |
| 191          | DNA1                 | N/A            | Fluidigm                   |
| 193          | DNA2                 | N/A            | Fluidigm                   |
| 148          | CD28                 | CD28.2         | Harvard Core               |
| 152          | CD14                 | M5E2           | Harvard Core               |
| 141          | ckit                 | 104D2          | Harvard Core, Self Conj.   |
| 142          | CD19                 | HIB19          | Harvard Core               |
| 143          | HLA-DR               | L243           | Fluidigm                   |
| 144          | CD64                 | 10.1           | Harvard Core               |
| 145          | CD16                 | 3G8            | Harvard Core               |
| 149          | CD25                 | 2A3            | Fluidigm                   |
| 155          | CD27                 | L128           | Fluidigm                   |
| 158          | CD3                  | UCHT1          | Harvard Core               |
| 159          | CD11c                | Bu15           | Harvard Core               |
| 164          | CD161                | HP-3G10        | Harvard Core               |
| 166          | CD24                 | ML5            | Harvard Core               |
| 168          | CCR6                 | G034E3         | Harvard Core               |
| 170          | CCR7                 | G043H7         | Harvard Core               |
| 172          | IgM                  | MHM-88         | Harvard Core               |
| 174          | CD4                  | OKT4           | Harvard Core               |
| 161          | CD203c               | NP4D6          | Harvard Core, self conj.   |
| 146          | CD8a                 | RPA-T8         | Harvard Core               |
| 150          | FCeR1                | AER-37 (CRA-1) | Fluidigm                   |
| 162          | CD56                 | HCD56          | Harvard Core               |
| 163          | CXCR3                | G025H7         | Fluidigm                   |
| 171          | CD127                | A019D5         | Harvard Core               |
| 173          | CD335                | 9E2            | Harvard Core, self conj.   |
| 115          | CD34                 | 581            | Harvard Core, self conj.   |
| 89           | CD45                 | HI30           | Fluidigm                   |

### Supplemental Table 3. GI Significance of Antigen Production (IgG) in Individuals with HαT, CD, and Non-HαT

| Antibody                                     | Presence in HαT patients | Presence in CD patients | Presence in non-HαT patients | Gastrointestinal Reference                                                                                                                                                   |
|----------------------------------------------|--------------------------|-------------------------|------------------------------|------------------------------------------------------------------------------------------------------------------------------------------------------------------------------|
| <b>Liver/Kidney Microsomal Type I (LKM1)</b> | 10/21                    | 5/20                    | 5/19                         | Autoimmune hepatitis. Targets the enzyme, CYP2D6, found primarily in liver cells.                                                                                            |
| <b>Gliadin</b>                               | 9/21                     | 4/20                    | 4/19                         | Gliadin is protein component of gluten. May indicate gluten-sensitive enteropathies. Gliadin alters barrier properties of intestinal epithelial cells.                       |
| <b>SP100</b>                                 | 8/21                     | 5/20                    | 4/19                         | Associated with primary biliary cirrhosis. Targets SP100 nuclear antigen.                                                                                                    |
| <b>Intrinsic Factor (IF)</b>                 | 7/21                     | 8/20                    | 6/19                         | IF protein is produced by parietal cells in the stomach. Presence of antibodies often leads to autoimmune induced anemia secondary to inability to absorb vitamin cobalamin. |
| <b>Scl-70/Topoisomerase I</b>                | 6/21                     | 8/20                    | 6/19                         | Mainly in systemic scleroderma and found in patients with connective tissue disease.                                                                                         |
| <b>Tissue Transglutaminase (TTG)</b>         | 6/21                     | 9/20                    | 5/19                         | Autoantigen of Celiac Disease. Marker for intestinal barrier defects.                                                                                                        |
| <b>Lipopolysaccharide (LPS)</b>              | 5/21                     | 6/20                    | 5/19                         | Contributes to systemic inflammation and impacts the intestinal barrier. Elevated in Inflammatory Bowel Disease.                                                             |
| <b>Amyloid</b>                               | 5/21                     | 8/20                    | 8/19                         | Demonstrated in intestinal epithelial cells, can impact absorption and secretion. Commonly studied in CNS and Alzheimer's Disease.                                           |
| <b>Collagen IV</b>                           | 2/21                     | 5/20                    | 4/19                         | Collagen IV is a major constituent of basement membranes. Useful in detecting loss of parts of basement membrane in carcinomas.                                              |

**Supplemental Figure 1. Terminal ileum T cells phenotype differs between H $\alpha$ T and quiescent CD.** tSNE plots of automated clustering by FlowSOM for leukocytes in H $\alpha$ T and CD (All) (**Panel A**). CD4 (clusters: 1,4,6), CD8 (clusters: 9-14, 16-20), and DNT (clusters: 2,3,5,7,8). Cluster identity is determined by marker expression of the heatmap in **Panel B**. **Panel B**. Heatmap of indicated antibody expression in the clusters and the associated phenotype of the cells in each cluster. **Panel C**. tSNE maps of patients with CD and individuals with H $\alpha$ T that are associated with **Panel A**.

**Supplemental Figure 2. Terminal ileum B cells phenotype reveal expanded CD27<sup>+</sup> memory B cells in H $\alpha$ T.** tSNE plots of automated clustering by FlowSOM for leukocytes in H $\alpha$ T and CD (All) (**Panel A**). Memory B cells (clusters: 2-6, 9 and 13), IgM B cells (clusters: 14-19). **Panel B**. Heatmap of indicated antibody expression in the clusters and the associated phenotype of the cells in each cluster. **Panel C**. tSNE maps of patients with CD and individuals with H $\alpha$ T that are associated with **Panel A**.

**Supplemental Figure 3. Panel A. Principal Component Analysis (PCA) array of IgM and IgG in non-H $\alpha$ T, H $\alpha$ T, and quiescent CD individuals. Panel B. Heatmap indicating antibody expression in non-H $\alpha$ T, H $\alpha$ T, and quiescent CD. Note: Race and ethnicity were accounted for in the analysis, and removing these variables had no effect on the result.**
